# Supplementary material
Source: HighWire-hosted journal article supplement (https://bibliotheek.ehb.be/content/8/1/e001415)
Supplement: inline-supplementary-material-1 [file inline-supplementary-material-1.pdf]

Appendix

Exhibit 1. Curative Care for Adult with Diabetes Vignette ..... 1

Exhibit 2. Mean Vignette Scores Adjusted for Provider Composition ..... 3

Exhibit 3. Average Vignette Scores by Province in 2007, 2014/15, and Change in Average  
Vignette Scores from 2007 to 2014/15 ..... 4

Exhibit 4. Regressions of Vignette Scores (%) on Provider Cadre and Characteristics..... 5

Exhibit 5. Robustness Checks..... 7

Exhibit 6. Adult Curative Care Vignette Analysis ..... 9

Exhibit 7. Analysis including Place of Education Variable for 2014/15 Survey Wave ..... 14

## Exhibit 1. Curative Care for Adult with Diabetes Vignette

**H23. For the rest of the interview, we would like to understand the process by which you examine an adult person suffering from diabetes. We would like to know everything you do, beginning with the arrival of the patient, waiting upon the patient and ending when he/she goes home. I shall describe the patient, and I will ask you a series of questions about activities you perform regularly. Once a section is complete, we are unable to go back and change answers. Now I will read out the case.**

Instructions to Interviewer:

1. Read out case 2 times, and then ask questions H25-29.
2. First listen to the respondent. Any response that he or she mentions spontaneously should be marked with Code 1.
3. After the respondent is finished with the whole questionnaire, tell the respondent that you are going to review the case again.
4. Start from the beginning and read the case a second time. Ask questions H25-29.
5. Read out any responses that he/she did not mention spontaneously the first time. Code the appropriate response.

**H24. Mr. Widyono came to this facility and presents to you "to get my sugar checked". He has just moved to the community and has never visited the facility. Now I would like to ask you exactly what you would do for this patient.**

**H25. What questions do you ask the patient about his present physical condition, high blood sugar, and medications?**

**Scored as correct if spontaneously mentioned by provider<sup>1</sup>**

|                                                    |     |
|----------------------------------------------------|-----|
| 1. How long have you suffered from this condition? | Yes |
| 2. Medications recently or currently taking?       | Yes |
| 3. Do you have to urinate frequently?              | Yes |
| 4. Frequent thirst?                                | Yes |
| 5. Any weight loss?                                | Yes |
| 6. Any sweating?                                   |     |
| 7. Any anxiety or heart palpitations?              |     |
| 8. Abdominal fullness prematurely after meals?     |     |
| 9. Edema or weight retention?                      | Yes |
| 10. Current treatment for hypertension?            | Yes |
| 11. Often feel tingling?                           | Yes |
| 12. Wound that stays?                              | Yes |
| 13. Often have ulcer?                              | Yes |
| 14. Family history?                                | Yes |
| 15. Feel weary?                                    |     |
| 16. Have checked blood sugar?                      |     |

**H26. What questions do you ask Mr. Widyono about his medical history and behavior?**

<sup>1</sup> These were deemed essential to provide quality care for an adult with diabetes by the study team.

|                                                                                    |     |
|------------------------------------------------------------------------------------|-----|
| 17. History of hypertension?                                                       | Yes |
| 18. History of high cholesterol?                                                   | Yes |
| 19. Co-existing or prior heart condition?                                          | Yes |
| 20. Prior eye examination?                                                         | Yes |
| 21. Prior hospitalization?                                                         | Yes |
| 22. Prior diabetic coma?                                                           | Yes |
| 23. Prior renal failure?                                                           | Yes |
| 24. Does he smoke regularly?                                                       | Yes |
| 25. Number of packages/quantity of smoking?                                        | Yes |
| 26. Alcohol use?                                                                   | Yes |
| 27. Immunization history?                                                          | Yes |
| 28. Regular exercise?                                                              | Yes |
| 29. Questions about nutrition/eating habits?                                       | Yes |
| 30. Is there any family member with this disease?                                  |     |
| <b>H27. What do you do when you conduct a physical examination of the patient?</b> |     |
| 31. Blood pressure in one arm?                                                     | Yes |
| 32. Blood pressure in both arms?                                                   |     |
| 33. Listen to chest/heart?                                                         | Yes |
| 34. Listen to abdomen?                                                             |     |
| 35. Examine the feet?                                                              | Yes |
| 36. Examine the peripheral vascular system?                                        |     |
| 37. Check for edema?                                                               | Yes |
| 38. Examine prostate?                                                              |     |
| 39. Pulse?                                                                         |     |
| 40. Respiration?                                                                   |     |
| <b>H28. What laboratory examinations would you conduct?</b>                        |     |
| 41. Chest X-ray                                                                    |     |
| 42. Blood chemistry: creatinine, glucose?                                          | Yes |
| 43. Sputum exam?                                                                   |     |
| 44. CBC?                                                                           |     |
| 45. Test for triglycerides?                                                        |     |
| 46. Ultrasound?                                                                    |     |
| 47. Liver functions/hepatic enzymes?                                               | Yes |
| 48. HgbA1c?                                                                        | Yes |
| <b>H29. What advice or future examinations would you offer for the patient?</b>    |     |
| 49. Recommend stop smoking?                                                        | Yes |
| 50. Nutritional advice?                                                            | Yes |
| 51. Advice about exercise?                                                         |     |
| 52. Examine the feet?                                                              | Yes |
| 53. Refer to other specialist (eye, foot, or heart)?                               | Yes |
| 54. Prescribe anti-hypertensives?                                                  | Yes |
| 55. Prescribe metformin?                                                           | Yes |
| 56. Make an appointment for the next visit?                                        | Yes |

## Exhibit 2. Mean Vignette Scores Adjusted for Provider Composition

| Cadre            | 2007 | 2014 | Weighted Mean |              | Re-weighted Mean |
|------------------|------|------|---------------|--------------|------------------|
|                  | Mean | Mean | 2007          | 2014         | 2014             |
| <b>Doctor</b>    | 39.0 | 33.2 | 28.6          | 18.7         | 24.4             |
| <b>Nurse</b>     | 31.1 | 25.3 | 4.7           | 6.3          | 3.8              |
| <b>Midwife</b>   | 32.1 | 21.8 | 2.0           | 3.2          | 1.4              |
| <b>Paramedic</b> | 34.3 | 22.0 | 1.8           | 0.8          | 1.1              |
| <b>Overall</b>   |      |      | <b>37.13</b>  | <b>29.11</b> | <b>30.69</b>     |

*Note:* The weighted mean was calculated by multiplying the cadre-specific mean by the proportion of the corresponding cadre for that year and taking the sum. The re-weighted mean was calculated using the proportion of each cadre from 2007 multiplied by the cadre-specific means from 2014 and summed.

Exhibit 3. Average Vignette Scores by Province in 2007, 2014/15, and Change in Average Vignette Scores from 2007 to 2014/15

|                    | <b>Average<br/>Vignette<br/>Score (%)<br/>2007</b> | <b>Average<br/>Vignette<br/>Score (%)<br/>2014/15</b> | <b>Change<br/>from 2007<br/>to<br/>2014/15</b> | <b>N (#)</b> |
|--------------------|----------------------------------------------------|-------------------------------------------------------|------------------------------------------------|--------------|
| South Sulawesi     | 48.81                                              | 25.29                                                 | -23.52                                         | 149          |
| Yogyakarta         | 48.37                                              | 34.33                                                 | -14.04                                         | 180          |
| West Sumatra       | 41.28                                              | 30.52                                                 | -10.76                                         | 94           |
| Central Java       | 38.44                                              | 33.43                                                 | -5.01                                          | 340          |
| Bali               | 37.36                                              | 24.04                                                 | -13.32                                         | 105          |
| West Java          | 37.35                                              | 34.00                                                 | -3.35                                          | 442          |
| Lampung            | 36.94                                              | 26.10                                                 | -10.84                                         | 88           |
| West Nusa Tenggara | 35.40                                              | 27.13                                                 | -8.27                                          | 92           |
| Jakarta            | 35.33                                              | 28.70                                                 | -6.63                                          | 450          |
| East Java          | 34.32                                              | 26.24                                                 | -8.08                                          | 372          |
| South Sumatra      | 31.05                                              | 26.27                                                 | -4.78                                          | 94           |
| North Sumatra      | 30.04                                              | 23.26                                                 | -6.78                                          | 195          |
| South Kalimantan   | 25.77                                              | 30.42                                                 | 4.65                                           | 103          |

Exhibit 4. Regressions of Vignette Scores (%) on Provider Cadre and Characteristics

|                                              | Model 1                  | p-value | Model 2                 | p-value | Model 3                | p-value |
|----------------------------------------------|--------------------------|---------|-------------------------|---------|------------------------|---------|
| <b>Year</b>                                  | -6.51<br>[-7.78,-5.24]   | <0.001  | -6.48<br>[-7.74,-5.22]  | <0.001  | -6.94<br>[-8.20,-5.67] | <0.001  |
| <b>Doctor</b>                                | Ref                      |         | Ref                     |         | Ref                    |         |
| <b>Nurse</b>                                 | -7.75<br>[-9.03,-6.47]   | <0.001  | -7.49<br>[-8.72,-6.25]  | <0.001  | -5.64<br>[-6.93,-4.34] | <0.001  |
| <b>Midwife</b>                               | -10.04<br>[-11.69,-8.40] | <0.001  | -8.52<br>[-10.15,-6.89] | <0.001  | -5.64<br>[-7.51,-3.78] | <0.001  |
| <b>Paramedic</b>                             | -7.80<br>[-10.56,-5.04]  | <0.001  | -7.26<br>[-9.77,-4.76]  | <0.001  | -5.06<br>[-7.53,-2.58] | <0.001  |
| <b>Rural</b>                                 |                          |         | Ref                     |         | Ref                    |         |
| <b>Urban</b>                                 |                          |         | 0.73<br>[-0.56,2.01]    | 0.266   | 0.84<br>[-0.41,2.09]   | 0.186   |
| <b>Experience (years)</b>                    |                          |         |                         |         | -0.07<br>[-0.13,-0.02] | 0.012   |
| <b>Ever had NCD Training</b>                 |                          |         |                         |         | 2.15<br>[0.96,3.35]    | <0.001  |
| <b>Ever had Diabetes Training</b>            |                          |         |                         |         | 2.56<br>[0.49,4.64]    | 0.016   |
| <b>Ever had Diabetes with Drugs Training</b> |                          |         |                         |         | 0.66<br>[-1.36,2.67]   | 0.521   |
| <b>Public</b>                                |                          |         |                         |         | Ref                    |         |
| <b>Private</b>                               |                          |         |                         |         | -1.86<br>[-2.78,-0.93] | <0.001  |
| <b>North Sumatra</b>                         |                          |         | Ref                     |         | Ref                    |         |
| <b>West Sumatra</b>                          |                          |         | 6.57<br>[4.06,9.07]     | <0.001  | 6.30<br>[3.74,8.87]    | <0.001  |
| <b>South Sumatra</b>                         |                          |         | 2.21<br>[-0.21,4.63]    | 0.073   | 2.08<br>[-0.24,4.39]   | 0.078   |
| <b>Lampung</b>                               |                          |         | 3.78<br>[1.81,5.75]     | <0.001  | 3.93<br>[1.92,5.93]    | <0.001  |
| <b>Jakarta</b>                               |                          |         | 1.11<br>[-1.42,3.63]    | 0.390   | 1.47<br>[-1.05,3.98]   | 0.253   |
| <b>West Java</b>                             |                          |         | 6.63<br>[4.53,8.72]     | <0.001  | 6.48<br>[4.43,8.53]    | <0.001  |
| <b>Central Java</b>                          |                          |         | 7.45<br>[4.53,10.36]    | <0.001  | 7.11<br>[4.23,9.98]    | <0.001  |
| <b>Yogyakarta</b>                            |                          |         | 11.12<br>[8.61,13.63]   | <0.001  | 10.73<br>[8.25,13.20]  | <0.001  |
| <b>East Java</b>                             |                          |         | 2.47<br>[0.23,4.71]     | 0.031   | 2.46<br>[0.20,4.72]    | 0.033   |
| <b>Bali</b>                                  |                          |         | 1.26<br>[-1.73,4.26]    | 0.407   | 1.73<br>[-1.24,4.71]   | 0.252   |
| <b>West Nusa Tenggara</b>                    |                          |         | 3.44<br>[0.39,6.49]     | 0.027   | 3.92<br>[1.06,6.78]    | 0.007   |

|                         |                      |        |                      |        |
|-------------------------|----------------------|--------|----------------------|--------|
| <b>South Kalimantan</b> | 0.53<br>[-2.94,4.00] | 0.765  | 1.17<br>[-2.36,4.70] | 0.514  |
| <b>South Sulawesi</b>   | 7.12<br>[5.01,9.22]  | <0.001 | 7.16<br>[5.04,9.29]  | <0.001 |

*Note:* 95% confidence intervals in brackets. Standard errors were clustered at the community level in all above regression models. Ref is an abbreviation for referent group.

## Exhibit 5. Robustness Checks

|                                         | <b>Robust Check 1</b>  | <b>p-value</b> | <b>Robust Check 2</b>  | <b>p-value</b> |
|-----------------------------------------|------------------------|----------------|------------------------|----------------|
| <b>Year</b>                             | -6.71<br>[-8.10,-5.32] | <0.001         | -6.87<br>[-8.13,-5.61] | <0.001         |
| <b>Nurse</b>                            | -6.06<br>[-7.49,-4.62] | <0.001         | -5.77<br>[-7.03,-4.50] | <0.001         |
| <b>Midwife</b>                          | -5.71<br>[-7.72,-3.70] | <0.001         | -5.60<br>[-7.44,-3.77] | <0.001         |
| <b>Paramedic</b>                        | -5.38<br>[-8.02,-2.73] | <0.001         | -5.15<br>[-7.53,-2.76] | <0.001         |
| <b>Urban</b>                            | 0.34<br>[-1.23,1.90]   | 0.673          | 0.75<br>[-0.44,1.95]   | 0.217          |
| <b>Experience (years)</b>               | -0.10<br>[-0.16,-0.03] | 0.003          | -0.08<br>[-0.14,-0.02] | 0.005          |
| <b>Ever had NCD Training</b>            | 2.27<br>[1.00,3.55]    | <0.001         | 2.18<br>[1.01,3.36]    | <0.001         |
| <b>Ever had Diabetes Training</b>       | 2.04<br>[-0.28,4.37]   | 0.084          | 2.32<br>[0.26,4.39]    | 0.027          |
| <b>Ever had Diabetes Drugs Training</b> | 0.28<br>[-2.00,2.55]   | 0.811          | 0.59<br>[-1.41,2.59]   | 0.563          |
| <b>Private</b>                          | -1.78<br>[-2.78,-0.79] | <0.001         | -1.83<br>[-2.74,-0.93] | <0.001         |
| <b>West Sumatra</b>                     |                        |                | 6.47<br>[3.93,9.02]    | <0.001         |
| <b>South Sumatra</b>                    |                        |                | 2.28<br>[-0.02,4.58]   | 0.052          |
| <b>Lampung</b>                          |                        |                | 4.03<br>[2.05,6.00]    | <0.001         |
| <b>Jakarta</b>                          |                        |                | 1.63<br>[-0.85,4.10]   | 0.198          |



|                           |                       |        |
|---------------------------|-----------------------|--------|
| <b>West Java</b>          | 6.70<br>[4.69,8.72]   | <0.001 |
| <b>Central Java</b>       | 7.29<br>[4.49,10.09]  | <0.001 |
| <b>Yogyakarta</b>         | 11.00<br>[8.59,13.42] | <0.001 |
| <b>East Java</b>          | 2.73<br>[0.48,4.98]   | 0.017  |
| <b>Bali</b>               | 1.63<br>[-1.21,4.47]  | 0.260  |
| <b>West Nusa Tenggara</b> | 4.08<br>[1.20,6.97]   | 0.006  |
| <b>South Kalimantan</b>   | 1.19<br>[-2.24,4.63]  | 0.496  |
| <b>South Sulawesi</b>     | 7.37<br>[5.29,9.44]   | <0.001 |

*Note:* 95% CI in brackets. Fully adjusted model with community fixed effects (Robust Check 1) and fully adjusted model with province fixed effects and community-level random effects (Robust Check 2).

## Exhibit 6. Adult Curative Care Vignette Analysis

As a supplementary analysis, we examined the change in a second clinical vignette (respiratory disease/cough) asked to the same providers to determine if there were changes in clinical knowledge for other care domains (see below for the vignette text and list of 12 items used to score the vignette). We standardized both the diabetes and respiratory disease vignette scores by subtracting the mean and dividing by the standard deviation before running the regressions to be able to compare the size of the coefficients for survey year between the regressions for diabetes and regressions for respiratory disease.

Provider knowledge of respiratory disease decreased from 53.4% (95% CI: 52.3 – 54.5) in 2007 to 47.3% (95% CI: 46.3 – 48.4) in 2014/15. The magnitude of the relative decrease from 2007 to 2014/15 was more than twice as high for the diabetes vignette score as it was for the respiratory disease vignette score.

Exhibit 6a. The Regression Coefficient on Year after Standardizing Both the Diabetes and Respiratory Disease Vignette Score<sup>1</sup>

|                            |             | <b>Model 1</b>         | <b>p-value</b> | <b>Model 2</b>         | <b>p-value</b> | <b>Model 3</b>         | <b>p-value</b> |
|----------------------------|-------------|------------------------|----------------|------------------------|----------------|------------------------|----------------|
| <b>Diabetes</b>            | <b>Year</b> | -0.46<br>[-0.55,-0.37] | <0.001         | -0.46<br>[-0.55,-0.37] | <0.001         | -0.49<br>[-0.58,-0.40] | <0.001         |
| <b>Respiratory Disease</b> | <b>Year</b> | -0.21<br>[-0.30,-0.13] | <0.001         | -0.20<br>[-0.29,-0.12] | <0.001         | -0.21<br>[-0.30,-0.13] | <0.001         |

<sup>1</sup> 95% confidence intervals in brackets. Standard errors were clustered at the community level in all above regression models.

## Exhibit 6b. Adult Curative Care Vignette: Regressions of Vignette Scores (%) on Provider Cadre and Characteristics

|             | <b>Model 1</b>         | <b>p-value</b> | <b>Model 2</b>         | <b>p-value</b> | <b>Model 3</b>         | <b>p-value</b> |
|-------------|------------------------|----------------|------------------------|----------------|------------------------|----------------|
| <b>Year</b> | -4.27<br>[-6.02,-2.53] | <0.001         | -4.07<br>[-5.78,-2.36] | <0.001         | -4.27<br>[-5.96,-2.58] | <0.001         |

|                                                          |                           |        |                          |        |                         |        |
|----------------------------------------------------------|---------------------------|--------|--------------------------|--------|-------------------------|--------|
| <b>Nurse</b>                                             | -9.21<br>[-11.05,-7.37]   | <0.001 | -8.71<br>[-10.56,-6.86]  | <0.001 | -7.85<br>[-9.65,-6.06]  | <0.001 |
| <b>Midwife</b>                                           | -14.75<br>[-17.12,-12.37] | <0.001 | -12.25<br>[-14.65,-9.85] | <0.001 | -7.54<br>[-9.94,-5.14]  | <0.001 |
| <b>Paramedic</b>                                         | -13.84<br>[-17.58,-10.10] | <0.001 | -13.14<br>[-16.72,-9.55] | <0.001 | -8.56<br>[-12.07,-5.05] | <0.001 |
| <b>Urban</b>                                             |                           |        | -0.29<br>[-2.02,1.44]    | 0.744  | -0.20<br>[-1.91,1.51]   | 0.819  |
| <b>Experience (years)</b>                                |                           |        |                          |        | 0.00<br>[0.00,0.01]     | <0.001 |
| <b>Ever had post-graduate training</b>                   |                           |        |                          |        | 3.55<br>[1.96,5.14]     | <0.001 |
| <b>Ever had respiratory disease training</b>             |                           |        |                          |        | 0.65<br>[-1.41,2.71]    | 0.537  |
| <b>Ever had respiratory disease antibiotics training</b> |                           |        |                          |        | 1.21<br>[-0.77,3.20]    | 0.230  |
| <b>Private</b>                                           |                           |        |                          |        | -9.15<br>[-10.46,-7.84] | <0.001 |
| <b>West Sumatra</b>                                      |                           |        | 13.74<br>[9.45,18.03]    | <0.001 | 12.90<br>[8.66,17.14]   | <0.001 |
| <b>South Sumatra</b>                                     |                           |        | 5.48<br>[2.20,8.77]      | 0.011  | 4.88<br>[1.39,8.37]     | 0.006  |

|                           |                        |                  |                        |                  |
|---------------------------|------------------------|------------------|------------------------|------------------|
| <b>Lampung</b>            | 9.42<br>[4.34,14.50]   | <0.001           | 9.11<br>[3.98,14.23]   | 0.011            |
| <b>Jakarta</b>            | 6.90<br>[3.31,10.50]   | <0.001           | 7.28<br>[3.72,10.85]   | <0.001           |
| <b>West Java</b>          | 14.36<br>[10.99,17.73] | <0.001           | 13.87<br>[10.56,17.18] | <0.001           |
| <b>Central Java</b>       | 14.93<br>[10.18,19.67] | <0.001           | 14.01<br>[9.25,18.77]  | <0.001           |
| <b>Yogyakarta</b>         | 17.30<br>[13.82,20.77] | 17.30<br>(0.000) | 17.19<br>[13.71,20.66] | 17.19<br>(0.000) |
| <b>East Java</b>          | 6.83<br>[3.92,9.74]    | <0.001           | 6.38<br>[3.50,9.27]    | <0.001           |
| <b>Bali</b>               | 8.56<br>[4.42,12.69]   | <0.001           | 9.18<br>[5.15,13.20]   | <0.001           |
| <b>West Nusa Tenggara</b> | 9.35<br>[5.08,13.61]   | <0.001           | 9.15<br>[5.18,13.12]   | <0.001           |
| <b>South Kalimantan</b>   | 3.44<br>[-1.32,8.21]   | 0.156            | 4.02<br>[-0.91,8.96]   | 0.110            |
| <b>South Sulawesi</b>     | 10.00<br>[5.96,14.05]  | <0.001           | 10.04<br>[5.95,14.13]  | <0.001           |

Note: 95% confidence intervals in brackets

Exhibit 6c. Curative Care for Adult

**H9. For the rest of the interview, we would like to understand the process by which you examine an adult person suffering from cough and fever. We would like to know everything you do, beginning with the arrival of the patient, waiting upon the patient and ending when he/she goes home. I shall describe the patient, and I will ask you a series of questions about activities you perform regularly. Once a section is complete, we are unable to go back and change answers. Now I will read out the case.**

**Instructions to Interviewer:**

1. Read out case 2 times, and then ask questions H25-29.
2. First listen to the respondent. Any response that he or she mentions spontaneously should be marked with Code 1.
3. After the respondent is finished with the whole questionnaire, tell the respondent that you are going to review the case again.
4. Start from the beginning and read the case a second time. Ask questions H25-29.
5. Read out any responses that he/she did not mention spontaneously the first time. Code the appropriate response.

**H10. Pak Widyono came to this facility with a complaint of coughing and a fever. Now I would like to ask you exactly what you would do for this patient.**

**H11. What questions do you ask the patient about his cough and fever, and current health?**

**Scored as correct if spontaneously mentioned<sup>2</sup>**

|                                                          |     |
|----------------------------------------------------------|-----|
| 1. How long have you suffered from this condition?       | Yes |
| 2. Any shortness of breath?                              |     |
| 3. Is there any blood when you cough?                    | Yes |
| 4. What was the color of the sputum?                     | Yes |
| 5. Do you have any pain in the chest?                    | Yes |
| 6. Any weight loss?                                      |     |
| 7. Is cough productive?                                  |     |
| 8. Any contact with others with respiratory problems/TB? |     |
| 9. Any night sweats?                                     |     |
| 10. What medicine have been taken?                       |     |
| 11. Any fever?                                           |     |
| 12. Feeling weak?                                        |     |
| 13. Any headache?                                        |     |
| 14. Losing appetite?                                     |     |
| 15. Nauseous?                                            |     |

**H12. What questions do you ask the patient about his medical history and behavior?**

|                                           |     |
|-------------------------------------------|-----|
| 16. Previous TB case or took TB medicine? | Yes |
|-------------------------------------------|-----|

<sup>2</sup> These were deemed essential to provide quality care for an adult with respiratory disease from: Rokx, Claudia; Giles, John; Satriawan, Elan; Marzoeke, Puti; Harimurti, Pandu; Yavuz, Elif. 2010. *New insights into the provision of health services in Indonesia : a health workforce study (English)*. Directions in development ; human development. Washington, DC: World Bank. <http://documents.worldbank.org/curated/en/799111468038325818/New-insights-into-the-provision-of-health-services-in-Indonesia-a-health-workforce-study>

|                                                                                    |     |
|------------------------------------------------------------------------------------|-----|
| 17. BCG immunization or ever positive PPD?                                         |     |
| 18. History of asthma or COPD?                                                     | Yes |
| 19. History of cardiac problems?                                                   |     |
| 20. History of malignancy or gastic surgery?                                       |     |
| 21. Medications recently or currently taking?                                      |     |
| 22. Drug allergies?                                                                |     |
| 23. Smoking history?                                                               |     |
| 24. Number of packages/quantity of smoking?                                        |     |
| 25. Alcohol use?                                                                   |     |
| 26. Live alone or with others?                                                     |     |
| 27. Employment?                                                                    |     |
| 28. Family health history?                                                         |     |
| 29. Sanitation, ventilation at home?                                               |     |
| <b>H13. What do you do when you conduct a physical examination of the patient?</b> |     |
| 30. Examine general appearance?                                                    | Yes |
| 31. Take temperature?                                                              | Yes |
| 32. Listen to respiration?                                                         | Yes |
| 33. Check for sore throat?                                                         | Yes |
| 34. Palpitate/feel throat/lymph nodes?                                             | Yes |
| 35. Is chest indrawing?                                                            | Yes |
| 36. Palpate abdomen?                                                               |     |
| 37. Pulse?                                                                         |     |
| <b>H14. What laboratory examinations would you conduct?</b>                        |     |
| 38. Chest x-ray                                                                    |     |
| 39. PPD or Mantoux test                                                            |     |
| 40. Sputum exam for TB                                                             |     |
| 41. Routine bloodwork                                                              |     |
| 42. Liver function                                                                 |     |
| 43. CD4/cell count                                                                 |     |
| 44. Urinalysis                                                                     |     |

Exhibit 7. Analysis including Place of Education Variable for 2014/15 Survey Wave

To examine whether the drop in clinical knowledge of diabetes between 2007 and 2014/15 was related to the rapid rise in new (and often unregulated) medical, nursing, and midwifery schools in Indonesia between the two survey waves, we included an indicator for the type of university from which a provider graduated in a separate set of regressions. This question was only asked in the 2014/15 wave of the IFLS. The answer options were ‘yes’ or ‘no’ for each of five well-established and highly-ranked universities in Indonesia (University of Indonesia, Gadjah Mada University, Airlangga University, Diponegoro University, and Padjadjaran University; henceforth referred to as “top-five universities”), “other state university”, “private university”, and “other”. We ran the same progression of regression models as described above among providers surveyed in 2014/15, additionally including an indicator for place of education.

Exhibit 7a. Distribution of Place of Education in 2014/15 Survey Wave

| Place of Education     | N   | %    |
|------------------------|-----|------|
| Top-Five University    | 209 | 14.0 |
| Other State University | 226 | 15.2 |
| Private University     | 406 | 27.2 |
| Other                  | 651 | 43.6 |

In 2014/15, vignette scores among providers who completed their studies at a top-five university were higher than for any of the other categories of educational institutions after controlling for provider geographic distribution and characteristics (-2.26 [95% CI: -4.97,0.44] percentage points for “other state university”, -3.03 [-5.53,-0.52] percentage points for “private university”, and -3.92 [95% CI: -6.31,-1.53] percentage points for “other”) (see Exhibit 7b below). The difference between top-five university graduates and those from other state universities did not reach statistical significance (p=0.101).

Exhibit 7b. Regressions of Vignette Scores (%) on Provider Cadre and Characteristics for 2014/15 including University variable

|                               | Model 1                 | p-value | Model 2                 | p-value | Model 3                | p-value |
|-------------------------------|-------------------------|---------|-------------------------|---------|------------------------|---------|
| <b>Doctor</b>                 | Ref                     |         | Ref                     |         | Ref                    |         |
| <b>Nurse</b>                  | -6.46<br>[-8.34,-4.59]  | <0.001  | -6.75<br>[-8.64,-4.86]  | <0.001  | -5.43<br>[-7.33,-3.54] | <0.001  |
| <b>Midwife</b>                | -9.86<br>[-11.83,-7.88] | <0.001  | -8.44<br>[-10.46,-6.41] | <0.001  | -5.98<br>[-8.23,-3.73] | <0.001  |
| <b>Paramedic</b>              | -9.68<br>[-12.56,-6.80] | <0.001  | -9.96<br>[-12.75,-7.17] | <0.001  | -7.20<br>[-9.83,-4.57] | <0.001  |
| <b>Top-Five University</b>    | Ref                     |         | Ref                     |         | Ref                    |         |
| <b>Other State University</b> | -3.34<br>[-6.01,-0.67]  | 0.014   | -1.42<br>[-4.17,1.32]   | 0.308   | -2.26<br>[-4.97,0.44]  | 0.101   |
| <b>Private University</b>     | -3.23<br>[-5.89,-0.57]  | 0.017   | -2.37<br>[-5.02,0.27]   | 0.079   | -3.03<br>[-5.53,-0.52] | 0.018   |
| <b>Other University</b>       | -4.51<br>[-6.93,-2.10]  | <0.001  | -3.46<br>[-5.97,-0.95]  | 0.007   | -3.92<br>[-6.31,-1.53] | 0.001   |
| <b>Rural</b>                  |                         |         | Ref                     |         | Ref                    |         |
| <b>Urban</b>                  |                         |         | 1.54<br>[-0.18,3.26]    | 0.078   | 1.47<br>[-0.24,3.17]   | 0.092   |
| <b>Experience (years)</b>     |                         |         |                         |         | -0.11<br>[-0.18,-0.04] | 0.003   |
| <b>NCD Training</b>           |                         |         |                         |         | 1.96<br>[0.54,3.37]    | 0.007   |
| <b>Diabetes Training</b>      |                         |         |                         |         | 1.21<br>[-0.99,3.41]   | 0.279   |



|                                        |                       |        |                        |        |
|----------------------------------------|-----------------------|--------|------------------------|--------|
| <b>Diabetes<br/>Drugs<br/>Training</b> |                       |        | 1.23<br>[-0.99,3.45]   | 0.277  |
| <b>Public</b>                          |                       |        | Ref                    |        |
| <b>Private</b>                         |                       |        | -3.38<br>[-4.61,-2.15] | <0.001 |
| <b>North<br/>Sumatra</b>               | Ref                   |        | Ref                    |        |
| <b>West Sumatra</b>                    | 4.25<br>[1.64,6.86]   | 0.001  | 4.02<br>[1.06,6.97]    | 0.008  |
| <b>South<br/>Sumatra</b>               | 3.10<br>[-0.49,6.69]  | 0.090  | 2.66<br>[-0.83,6.15]   | 0.135  |
| <b>Lampung</b>                         | 3.13<br>[0.36,5.89]   | 0.027  | 3.15<br>[0.29,6.02]    | 0.031  |
| <b>Jakarta</b>                         | -0.78<br>[-3.58,2.02] | 0.585  | -0.53<br>[-3.31,2.24]  | 0.706  |
| <b>West Java</b>                       | 6.96<br>[4.47,9.44]   | <0.001 | 6.94<br>[4.46,9.42]    | <0.001 |
| <b>Central Java</b>                    | 7.04<br>[4.08,9.99]   | <0.001 | 6.69<br>[3.68,9.71]    | <0.001 |
| <b>Yogyakarta</b>                      | 4.59<br>[1.22,7.97]   | 0.008  | 4.04<br>[0.61,7.48]    | 0.021  |
| <b>East Java</b>                       | 1.17<br>[-1.00,3.33]  | 0.291  | 1.09<br>[-1.14,3.32]   | 0.337  |
| <b>Bali</b>                            | -2.88<br>[-6.28,0.51] | 0.096  | -2.01<br>[-5.56,1.54]  | 0.267  |
| <b>West Nusa</b>                       | 2.42                  | 0.279  | 2.03                   | 0.351  |

|                         |                       |       |                       |       |
|-------------------------|-----------------------|-------|-----------------------|-------|
| <b>Tenggara</b>         | [-1.98,6.82]          |       | [-2.24,6.29]          |       |
| <b>South Kalimantan</b> | 4.44<br>[-1.01,9.88]  | 0.110 | 4.26<br>[-1.49,10.01] | 0.146 |
| <b>South Sulawesi</b>   | -1.15<br>[-4.32,2.02] | 0.475 | -0.58<br>[-3.78,2.63] | 0.723 |

*Note:* 95% confidence intervals in brackets
